1 **Associative learning in larval and adult *Drosophila* is impaired by the**  
2 **dopamine-synthesis inhibitor 3-Iodo-L-tyrosine**

3

4 Running title: 3IY impairs learning in *Drosophila*

5

6 Juliane Thoener<sup>1,=</sup>

7 Christian König<sup>1,=</sup>

8 Alicé Weiglein<sup>1,2</sup>

9 Naoko Toshima<sup>1</sup>

10 Nino Mancini<sup>1</sup>

11 Fatima Amin<sup>1</sup>

12 Michael Schleyer<sup>1</sup>

13

14 <sup>1</sup> Leibniz Institute for Neurobiology, Department of Genetics, 39118 Magdeburg, Germany

15 <sup>2</sup> Current address: Otto von Guericke University Magdeburg, Institute of Anatomy, 39118 Magdeburg,

16 Germany

17 <sup>=</sup> These authors contributed equally

18

19 Corresponding authors:

20 [mschleye@lin-magdeburg.de](mailto:mschleye@lin-magdeburg.de)

21 [ckoenig@lin-magdeburg.de](mailto:ckoenig@lin-magdeburg.de)

22

23 Key words:

24 Pharmacology, Optogenetics, Reward, Punishment, PPL DAN, L-DOPA

25

26 **Summary statement**

27 We surveyed the effects of a dopamine-synthesis inhibitor on associative learning in larval and adult  
28 *Drosophila*. This approach supplements available genetic tools in investigating the conserved  
29 reinforcing function of dopamine.

30

31 **Abstract**

32 Across the animal kingdom, dopamine plays a crucial role in conferring reinforcement signals that  
33 teach animals about the causal structure of the world. In the fruit fly *Drosophila melanogaster*, the  
34 dopamine system has largely been studied using a rich genetic toolbox. Here, we suggest a  
35 complementary pharmacological approach applying the dopamine-synthesis inhibitor 3-Iodo-L-  
36 tyrosine (3IY), which causes acute systemic inhibition of dopamine signaling. Using Pavlovian  
37 conditioning, across developmental stages (3<sup>rd</sup> instar larva versus adult), valence domains (reward  
38 versus punishment), and types of reinforcement (natural versus optogenetically induced), we find that  
39 3IY feeding specifically impairs associative learning, whereas additional feeding of L-3,4-  
40 dihydroxyphenylalanine (L-DOPA), a precursor of dopamine, rescues this impairment. This study  
41 establishes a simple, quick, and comparably low-cost approach that can be combined with the  
42 available genetic tools to manipulate and clarify the functions of the dopaminergic system – in *D.*  
43 *melanogaster* and other animals.

44

## 45 **Introduction**

46 Dopamine signaling serves multiple functions, including movement initiation, sleep regulation,  
47 motivation, learning, memory extinction and forgetting (Berke, 2018; Meder et al., 2019; Oishi and  
48 Lazarus, 2017; Schultz, 2007; Yamamoto and Seto, 2014). In particular, it is crucial for conferring  
49 reinforcement signals that teach animals about the causal structure of the world (Ryvkin et al., 2018;  
50 Schultz, 2015; Waddell, 2013; Yamamoto and Vernier, 2011). This important role of dopamine is found  
51 across the animal kingdom, including the fruit fly *Drosophila melanogaster*. For this model organism,  
52 a rich genetic toolbox is available to study the functions of the dopaminergic system. Here, we suggest  
53 a complementary approach using pharmacological interventions that allow acute systemic  
54 manipulations of dopamine signaling.

55 Since the 1970s, both adult and larval *D. melanogaster* have been established as powerful model  
56 organisms to investigate Pavlovian conditioning, using odors as the conditioned stimulus (CS) and  
57 various types of rewarding and punishing unconditioned stimuli (US) (adults: Busto et al., 2010;  
58 McGuire et al., 2005; Perisse et al., 2013; Quinn et al., 1974; larvae: Diegelmann et al., 2013; Gerber  
59 and Stocker, 2007; Scherer et al., 2003; Thum and Gerber, 2019; Widmann et al., 2018). The genetic  
60 tools available for *D. melanogaster* allowed the genetic and neuronal mechanisms of learning and  
61 memory to be investigated, and revealed many striking similarities between the dopaminergic systems  
62 of flies and mammals, including humans (reviewed in Yamamoto and Seto, 2014). To mention but a  
63 few, flies and mammals share most genes involved in dopamine synthesis, secretion and signaling  
64 (Clark et al., 1978; Karam et al., 2019; Riemensperger et al., 2011; Yamamoto and Seto, 2014), and  
65 they also have in common the crucial role of dopaminergic neurons in reinforcement signaling (Burke  
66 et al., 2012; Liu et al., 2012; Schroll et al., 2006; Schwaerzel et al., 2003; Selcho et al., 2009; reviewed  
67 in Scaplen and Kaun, 2016). Of note is that in *D. melanogaster* different sets of dopaminergic neurons  
68 signal appetitive or aversive reinforcement, respectively, to distinct compartments of the insects'  
69 memory center, the mushroom body, which harbors a sparse and specific representation of the  
70 olfactory environment (Diegelmann et al., 2013; Guven-Ozkan and Davis, 2014; Heisenberg, 2003;  
71 Oswald and Waddell, 2015; Thum and Gerber, 2019). Due to the power, ease and elegance of the  
72 available genetic tools in *D. melanogaster*, other potentially useful techniques are often overlooked.  
73 For example, feeding or injecting drugs lacks the neuronal specificity of many transgenic tools but is a  
74 convenient way of exerting acute systemic effects. Furthermore, these approaches can be combined  
75 with genetic methods, allowing greater flexibility in manipulating the animals' nervous system.

76 Interestingly, it has been demonstrated that many drugs affecting the dopamine system in  
77 mammals are also effective in flies (Nichols, 2006; Pandey and Nichols, 2011). A number of drugs that  
78 target mammalian D1 and D2 receptors have been used pharmacologically to activate and inhibit their  
79 *Drosophila* homologs in vivo (Chang et al., 2006; Srivastava et al., 2005; Yellman et al., 1997). Also,

80 drugs that induce dopamine deficiency have been found to influence various brain functions. For  
81 example, 3-Iodo-L-tyrosine (3IY; other terms: 3-IY or 3-IT) interferes with dopamine synthesis by  
82 inhibiting the tyrosine hydroxylase enzyme (TH) that catalyzes the conversion of L-tyrosine to L-3,4-  
83 dihydroxyphenylalanine (L-DOPA), a precursor of dopamine, and it consequently reduces dopamine  
84 levels (Bainton et al., 2000; Fernandez et al., 2017; Neckameyer, 1996) (**Fig. S1**). Feeding 3IY to flies  
85 decreases activity/locomotion and increases sleep (Andretic et al., 2005; Cichewicz et al., 2017; Tomita  
86 et al., 2015; Ueno and Kume, 2014), and it alters courtship behavior (Monier et al., 2019; Neckameyer,  
87 1998; Wicker-Thomas and Hamann, 2008). Regarding learning and memory, 3IY feeding leads to  
88 impaired visual and olfactory learning, as well as impaired long-term appetitive ethanol memory (Kaun  
89 et al., 2011; Seugnet et al., 2008; Zhang et al., 2008). Importantly, these effects of 3IY-induced  
90 dopamine deficiency can be substantially rescued by additionally feeding L-DOPA to the flies  
91 (Cichewicz et al., 2017; Monier et al., 2019; Riemensperger et al., 2011; Zhang et al., 2008).

92 In larvae, 3IY feeding has been used to study the developmental effects of dopamine  
93 (Neckameyer, 1996, reviewed in Verlinden, 2018) as well as the characterization of dopamine  
94 synthesis, reuptake and release (Pyakurel et al., 2018; Xiao and Venton, 2015). Furthermore, 3IY has  
95 been found to attenuate a food-odor-elicited increase in sugar feeding, an effect that was reversed by  
96 additional L-DOPA feeding (Wang et al., 2013). To our knowledge, no studies have used 3IY feeding to  
97 study learning and memory in larvae.

98 Here, we provide the first systematic investigation of the effects of feeding 3IY and/or L-DOPA  
99 on Pavlovian conditioning in both larval and adult *D. melanogaster*. We report detailed protocols of  
100 drug application and behavioral controls, and demonstrate the effectiveness of the approach across  
101 developmental stages (3<sup>rd</sup> instar larva versus adult), valence domains (reward versus punishment),  
102 types of conditioning paradigm (absolute versus discriminatory), and types of reinforcement (natural  
103 versus optogenetically induced).

104

## 105 **Materials & Methods**

106

### 107 **Animals**

108 *Drosophila melanogaster* were raised in mass culture on standard cornmeal-molasses food and  
109 maintained at 25 °C, 60-70 % relative humidity, and a 12/12 h light/dark cycle.

110 For larval behavior experiments, we used 3<sup>rd</sup> instar, feeding-stage wild-type Canton Special  
111 larvae of either sex, aged 4 or 5 days after egg laying, as mentioned along with the results. For adult  
112 behavior experiments, the split-GAL4 driver strain *MB320C* (detailed information can be found in the  
113 relevant database <http://splitgal4.janelia.org/cgi-bin/splitgal4.cgi> as well as in Aso et al., 2014),  
114 covering the PPL1-γ1pedc neurons (alternative nomenclatures: PPL1-01 and MB-MP1), was crossed to

115 *UAS-ChR2-XXL* (Bloomington stock number: 58374, Dawydow et al., 2014) as the effector and kept in  
116 darkness throughout to avoid optogenetic activation by room light. Flies of either sex, aged 1 to 4 days  
117 after hatching, were used.

118

### 119 **Feeding of 3IY to larval *D. melanogaster***

120 A 0.5 mg/ml yeast solution was prepared from fresh baker's yeast (common supermarket brands)  
121 diluted in tap water and stored for up to 5 days at 4 °C in a closed bottle. Samples of 2 ml yeast solution  
122 were filled into a 15 ml Falcon tube and kept for a few minutes in a warm water bath. 3-Iodo-L-tyrosine  
123 (3IY; stored at -20 °C; CAS: 70-78-0, Sigma, Steinheim, Germany) was added at a concentration of 5  
124 mg/ml to the respective sample, if not mentioned otherwise. Notably, in contrast to earlier studies  
125 using 10 mg/ml or more (Neckameyer, 1996; Wang et al., 2013), we were not able to dissolve  
126 concentrations higher than 5 mg/ml. In some experiments, 3,4-dihydroxyphenylalanine (L-DOPA; CAS:  
127 59-92-7, Sigma, Steinheim, Germany) was added at a concentration of 10 mg/ml, either to pure yeast  
128 solution, or to yeast solution with 5 mg/ml 3IY.

129 The solutions were thoroughly mixed by attaching the Falcon tubes to a shaker at high speed for  
130 approximately 60 min. Empty vials of 5 cm diameter were equipped with two layers of mesh (PET, 500  
131 µm mesh size). Samples of the mixed yeast solution with or without additional substances were  
132 distributed onto the mesh of one vial. Larvae of the 3<sup>rd</sup> instar feeding stage were collected from the fly  
133 food by adding 15 % sucrose solution (*D*-Sucrose; CAS: 57-50-1, Roth, Karlsruhe, Germany; in dH<sub>2</sub>O) so  
134 that the larvae floated up and could be transferred to a Petri dish filled with tap water using a tip-cut  
135 plastic pipette. After being rinsed in water, the larvae were loaded onto a filter (pluriStrainer 70 µm,  
136 pluriSelect Life Science, Leipzig, Germany) to separate them from water and small food particles, and  
137 transferred with a brush to one of the prepared vials. For yeast solutions containing different drugs  
138 and/or concentrations, different brushes were used. The larvae were left to feed on the respective  
139 yeast solution for 24 or 4 hours at 25 °C and 60-70% relative humidity. The desired number of larvae  
140 were collected with a brush, briefly rinsed in water, and afterwards used in the respective experiment.

141

### 142 **Larval behavior**

#### 143 *Odor-fructose associative learning*

144 Experiments for appetitive odor-fructose associative memory (Saumweber et al., 2011; Scherer et al.,  
145 2003) were performed using a one-odor, single-training-trial protocol described in Weiglein et al.  
146 (2019). For example, two custom-made Teflon containers of 5 mm diameter were filled with 10 µl of  
147 odor substance (*n*-amylacetate, AM; CAS: 628-63-7, Merck, Darmstadt, Germany; diluted 1:20 in  
148 paraffin oil; CAS: 8042-47-5, AppliChem, Darmstadt, Germany) and closed with lids perforated with 5-  
149 10 holes, each of approximately 0.5 mm diameter. These odor containers were located on opposite

150 sides of a Petri dish (9 cm inner diameter; Nr. 82.1472 Sarstedt, Nümbrecht, Germany) filled with 1 %  
151 agarose solution (electrophoresis grade; CAS: 9012-36-6, Roth, Karlsruhe, Germany) and additionally  
152 containing fructose (FRU; 2 M; purity 99 %; CAS: 57-48-7 Roth, Karlsruhe, Germany) as a taste reward  
153 (+). Cohorts of approximately 30 larvae were placed at the center of the Petri dish and allowed to move  
154 about the Petri dish for 2.5 min. Subsequently, they were transferred with a brush to a fresh Petri dish  
155 that was filled with plain, tasteless agarose and equipped with two empty Teflon containers (EM). For  
156 each cohort trained in such a paired way (paired training; AM+/EM), a second cohort of larvae received  
157 the odor unpaired from the fructose reward (unpaired training; EM+/AM). In half of the cases the order  
158 of sequence was reversed (EM/AM+, AM/EM+, respectively).

159 After one training trial, the larvae were transferred to a fresh, tasteless test Petri dish with AM  
160 on one side and an EM container on the opposite side. The larvae were left to distribute for 3 min and  
161 then counted to evaluate their preference for AM. The number of larvae (#) on the AM side, on the  
162 EM side, and in a 10-mm wide middle zone was counted. Larvae crawling up the sidewalls of the Petri  
163 dish were counted for the respective side, whereas larvae on the lid were excluded from the analysis.  
164 A preference index (AM PREF) was calculated:

165

$$166 \quad AM \text{ PREF} = \frac{(\#AM - \#EM)}{\#Total} \quad (1)$$

167

168 AM PREF values range from +1 to -1, with positive values indicating odor preference and negative  
169 values indicating avoidance of AM.

170 From the AM PREF scores after paired and unpaired training, a performance index (PI) was  
171 calculated as follows:

172

$$173 \quad PI = \frac{(AM \text{ PREF Paired} - AM \text{ PREF Unpaired})}{2} \quad (2)$$

174

175 Performance indices range from +1 to -1. Positive PIs indicate appetitive associative memory; negative  
176 values indicate aversive associative memory.

177

### 178 *Innate odor preference tests*

179 Cohorts of approx. 20–30 experimentally naïve larvae were collected, briefly washed in tap water, and  
180 placed onto a Petri dish with an AM container on one side and an empty container on the other side.  
181 After 3 minutes, the odor preference was determined as detailed in equation (1).

182

### 183 *Innate fructose preference tests*

184 Split Petri dishes were prepared freshly approx. 4 hours before the experiment, following the  
185 procedures described in König et al. (2014) such that one half of the Petri dish (9 cm diameter) was  
186 filled with agarose with 2 M fructose (FRU), and the other half with plain agarose. Approx. 20–30 larvae  
187 were collected, rinsed in tap water, and placed onto the center of a split Petri dish. After 3 min, the  
188 number of larvae (#) on the fructose side, on the pure agarose side, and in a 10-mm wide middle zone  
189 was counted. Fructose preference was calculated as follows:

190

$$191 \quad FRU \text{ PREF} = \frac{(\# \text{ Fructose} - \# \text{ Agarose})}{\# \text{ Total}} \quad (3)$$

192

193 FRU PREF scores range from +1 to -1, with positive values indicating fructose preference and negative  
194 values indicating avoidance.

195

### 196 *Analyses of locomotion*

197 Cohorts of approximately 20 larvae were placed on an empty, plain-agarose-filled Petri dish without  
198 odor or reward. For three minutes, they were video-recorded while they freely moved in the dish. The  
199 videos were analyzed offline using custom-made tracking software described in Paisios et al. (2017).  
200 In brief, larvae alternately perform relatively straight forward locomotion, called runs, and lateral head  
201 movements, called head casts (HCs) that are often followed by changes in direction. This leads to a  
202 typical zig-zagging pattern of locomotion (Gershow et al., 2012; Gomez-Marin and Louis, 2014; Gomez-  
203 Marin et al., 2011). As described in detail by Paisios et al. (2017), an HC was detected whenever the  
204 angular velocity of a vector through the animal's head exceeded a threshold of 35 °/s and ended as  
205 soon as that angular velocity dropped below the threshold again. The time during which an animal was  
206 not head-casting was regarded as a run, deducting 1.5 seconds before and after an HC to exclude the  
207 decelerating and accelerating phases that usually happen before and after an HC, respectively. Three  
208 aspects of behavior were analyzed:

- 209 • the run speed was determined as the average speed (mm/s) of the larval midpoint during runs;
- 210 • the rate of HCs was determined as the number of HCs per second (HC/s);
- 211 • the size of HCs was determined by the HC angle. Accordingly, the animal's bending angle as the  
212 angle between vectors through the head and tail was determined before and after an HC. Then,  
213 the HC angle was calculated as the difference between the animal's bending angle after an HC  
214 and the bending angle before an HC. For a detailed description, see Paisios et al. (2017).

215 To analyze the HC behavior in more detail, we determined the HC rate and HC angle separately for  
216 small and large HCs. The discriminatory threshold for large HCs of an HC angle > 20° was based on  
217 previous studies (Paisios et al., 2017; Schleyer et al., 2015; Thane et al., 2019).

218

219 **Feeding of 3IY to adult *D. melanogaster***

220 For 3IY feeding in adult flies, a 5 % sucrose solution (CAS: 57-50-1, Hartenstein, Würzburg, Germany)  
221 was prepared. This solution was either used pure, or mixed with 5 mg/ml 3IY, or with 10 mg/ml L-  
222 DOPA, or with both, in an analogous manner to that described above for the larval case. Hatched adults  
223 of the genotype *MB320C;ChR2-XXL* were collected in fresh food vials and kept under the normal  
224 culture conditions mentioned above, at least overnight and at most until 4 days after hatching. Flies  
225 were transferred to new vials containing a tissue (Fripa, Düren, Germany) soaked with 1.8 ml of sucrose  
226 solution that either did or did not contain 3IY and/or L-DOPA, as mentioned in the results section. After  
227 40-48 h under otherwise normal culture conditions, the flies were trained and / or tested *en masse*, in  
228 cohorts of ~100 in the respective paradigm.

229

230 **Adult behavior**

231 *Odor-PPL1- $\gamma$ 1pedc associative learning*

232 For the memory assays, we followed the procedures described in König et al. (2018), unless mentioned  
233 otherwise. Flies were loaded into a small transparent tube in a custom-made set-up (CON-  
234 ELEKTRONIK, Greussenheim, Germany) and were trained and tested at 23–25°C and 60–80% relative  
235 humidity. Training was performed in dimmed red light, which is largely invisible to flies and does not  
236 stimulate the ChR2-XXI effector; testing was performed in darkness. For the application of blue light,  
237 a 2.5 cm-diameter and 4.5 cm-length hollow tube with 24 LEDs mounted on the inner surface was  
238 placed around the transparent training tubes harboring the flies. As odorants, 50  $\mu$ l benzaldehyde (BA)  
239 and 250  $\mu$ l 3-octanol (OCT) (CAS 100-52-7, 589-98-0; both from Fluka, Steinheim, Germany) were  
240 applied to 1 cm-deep Teflon containers of 5 and 14 mm diameter, respectively. From these, odor-  
241 loaded air was shunted into the permanent air stream flowing through the apparatus. During training,  
242 the flies were presented with both odors for 1 min with a 3 min resting interval in between, but only  
243 one of the odors was paired with 1 min of blue light (465 nm) for optogenetic activation of PPL1-  
244  $\gamma$ 1pedc, whereas the other odor was presented alone (either BA-paired or OCT-paired training,  
245 respectively). In half of the cases training started with the odor paired with light (CS+); in the other half  
246 training started with the odor without light activation (CS-; for details see electronic supplement figure  
247 S1B of König et al., 2019). For the subsequent test, the flies were given a 3 min accommodation period,  
248 after which they were transferred to the T-maze-like choice point. The test configuration between the  
249 two odors used during training was prepared and balanced so that either BA or OCT were present at  
250 front vs rear position over the course of all experiments. After 2 min testing time, the arms of the maze  
251 were closed and the flies on each side were counted to calculate a benzaldehyde preference index (BA  
252 PREF):

253



254  $BA\ PREF = \frac{(\#BA - \#OCT)}{\#Total}$  (4)

255

256 Thus, positive scores indicate preference for BA and negative scores preference for OCT. From the BA  
257 PREF scores of two independently trained fly groups after BA-paired and OCT-paired training, a  
258 performance index (PI) was calculated as follows:

259

260  $PI = \frac{(BA\ PREF\ BA\text{-Paired} - BA\ PREF\ OCT\text{-Paired})}{2}$  (5)

261

262 Positive performance indices thus reflect appetitive associative memory, negative values aversive  
263 associative memory.

264

### 265 *Innate odor preference tests*

266 Cohorts of ~ 50 flies were loaded into the setup. After a 5 min resting interval, they were transferred  
267 to the choice point of a T-maze between an arm equipped with either BA or OCT, and an arm with an  
268 empty Teflon container, and allowed to distribute for 2 min. A Preference was calculated as:

269

270  $BA\ PREF = \frac{(\#BA - \#EM)}{\#Total}$  or  $OCT\ PREF = \frac{(\#OCT - \#EM)}{\#Total}$  (6)

271

272 Each data point in Fig. 4C and D represents the mean value of 2 runs tested with the odor in the front  
273 or rear T-Maze position.

274

### 275 **Statistics**

276 Two-tailed, non-parametric statistics were used throughout to analyze the behavioral data. For  
277 comparisons of a group's scores with chance levels (zero), one-sample sign tests (OSS) were applied.  
278 To compare across multiple independent groups, Kruskal-Wallis tests (KW) with subsequent pair-wise  
279 Mann-Whitney U-tests (MWU) were used (Statistica 13, StatSoft Inc, Tulsa, USA). To ensure a within-  
280 experiment error rate below 5%, a Bonferroni-Holm (BH) correction for multiple comparisons was  
281 employed (Holm, 1979). Sample sizes (biological replications) were estimated based on previous  
282 studies with small to medium effect sizes (König et al., 2018; Weiglein et al., 2019). None of the specific  
283 experiments reported here had previously been performed in our laboratory, although the basic  
284 behavioral paradigms are regularly used. Experimenters were blind to treatment condition during the  
285 experiments with larvae, and during the fly counting for the experiments with adults. Data are  
286 presented as box plots showing the median as the middle line, the 25 and 75 % quantiles as box

287 boundaries, and the 10 and 90 % quantiles as whiskers. All data from behavioral experiments are  
288 documented in the Supplemental Data file 'Table S1'.

289

## 290 **Results**

### 291 *Feeding 3IY for 24 hours induces broad behavioral impairments in larvae*

292 We first investigated the effects of 3IY feeding on *D. melanogaster* larvae. In an approach modified  
293 from Neckameyer (1996), cohorts of 4-day-old larvae were placed on a PET mesh soaked with a yeast  
294 solution mixed with 3IY at the indicated concentrations, or without 3IY. After 24 hours, the larvae  
295 underwent a single-trial Pavlovian training with odor and sugar reward, following established protocols  
296 (Michels et al., 2017; Saumweber et al., 2011; Scherer et al., 2003; Weiglein et al., 2019): one cohort  
297 of larvae was trained by a paired presentation of odor and reward, whereas a second cohort was  
298 trained reciprocally, i.e. with separated, unpaired presentations of odor and reward. In control larvae  
299 that were kept on a yeast solution without 3IY, an appetitive associative memory was revealed by  
300 higher odor preferences after paired than after unpaired training in a subsequent test (**Fig. S2A**),  
301 indicated by positive performance index (PI) scores (**Fig. 1A**, left-most box plot). When we performed  
302 the same learning experiment with larvae fed with various concentrations of 3IY, we observed  
303 decreased memory scores with increased 3IY concentrations. Significantly reduced scores were found  
304 for a concentration of 5 mg/ml (**Fig. 1A and S2A**), a result we replicated in an independent experiment  
305 (**Fig. 1B and S2B**). However, we noticed that many larvae had died due to the treatment, and the cuticle  
306 of many of the surviving animals was darkened (not shown). We therefore wondered whether the  
307 treatment may generally impair behavioral faculties. Indeed, innate odor preference was found to be  
308 impaired in 3IY-fed larvae (**Fig. 1C**). This prompted us to test their basic locomotion on an empty,  
309 tasteless Petri dish without odor or sugar, and to analyze their behavior using custom-made analysis  
310 software (Paisios et al., 2017). Typically, larvae move by relatively straight runs, interrupted by turning  
311 maneuvers indicated by lateral head movements called head casts (HC) (**Fig. S2C**) (Gershow et al.,  
312 2012; Gomez-Marin and Louis, 2014; Gomez-Marin et al., 2011; Paisios et al., 2017; Thane et al., 2019).  
313 Analysis of these parameters of locomotion revealed that the animals' run speed was unchanged by  
314 3IY feeding (**Fig. 1D**). However, the larvae fed with 3IY systematically performed fewer and larger HCs  
315 than control animals (**Fig. 1E-F, Fig. S2D-G**).

316 Thus, feeding the larvae with 5 mg/ml 3IY for 24 hours seemed to impair their basic behavioral  
317 faculties, suggesting that the reduced memory scores that we observed after the treatment might be  
318 secondary to such general impairment. Therefore, we next sought to reduce the 'side effects' of 3IY  
319 feeding.

320

### 321 *Feeding 3IY for 4 hours specifically impairs associative learning in larvae*

322 Given the reported role of dopamine and the TH enzyme in development and cuticle formation (Friggi-  
323 Grelin et al., 2003; Hsouna et al., 2007; Neckameyer, 1996; Neckameyer and White, 1993; reviewed in  
324 Verlinden, 2018), the timing of 3IY feeding is likely to have an impact. In order to minimize  
325 developmental effects, it seems desirable to apply 3IY as late as possible in the larval life cycle (and yet  
326 early enough to be able to finish the experiment before the larvae start to pupate). We therefore  
327 reduced the duration of 3IY feeding to four hours, which allowed for the feeding of 3IY to 5-day-old  
328 animals. After this shortened feeding protocol too, memory scores were reduced compared to controls  
329 (**Fig. 2A** and **S3A**). Critically, the animals' basic behavioral faculties turned out to be intact: no  
330 impairment in innate odor preference (**Fig. 2B**) or sugar preference (**Fig. 2C**) was detectable. Thus, the  
331 shortened feeding of 3IY specifically impaired associative memory without impairing task-relevant  
332 behavioral faculties (nor did we observe any dead or darkened larvae; not shown). A more detailed  
333 analysis of locomotion revealed only a very mild increase in the HC rate but otherwise no differences  
334 with respect to controls (**Fig. 2D-F**, for a more detailed analysis, see **Fig. S3B-E**).

335 We next tried to rescue the effect of 3IY on the TH enzyme by additionally feeding the animals  
336 with L-DOPA (**Fig. S1**). To this end, we fed animals either with plain yeast solution (control), or 5 mg/ml  
337 3IY, or with both 5 mg/ml 3IY and 10 mg/ml L-DOPA. The memory scores were impaired in larvae fed  
338 with 3IY alone (**Figure 3A**), replicating the results from Figure 2A. These reduced memory scores were  
339 restored to control levels by additionally feeding L-DOPA to the larvae (**Fig. 3A** and **S4A**). Innate odor  
340 and sugar preferences were not affected by either 3IY or combined 3IY and L-DOPA feeding, confirming  
341 that both effects were specific for associative learning (**Fig. 3B-C**). Importantly, while a repetition of  
342 the experiment from Figure 3A replicated the finding that L-DOPA feeding can restore memory scores  
343 upon 3IY treatment, we also showed that the feeding of L-DOPA alone did not increase memory scores  
344 (**Fig. 3D** and **S4B**).

345

#### 346 *Feeding of 3IY specifically impairs associative learning in adults*

347 After demonstrating the effectiveness of 3IY feeding on associative learning about natural sugar  
348 rewards in larvae, we sought to study how broadly applicable the 3IY approach might be. Therefore,  
349 we applied it to a very different learning paradigm, by using adult flies instead of larvae; a two-odor  
350 discrimination paradigm instead of a one-odor, non-discriminatory paradigm; and an optogenetic  
351 punishment instead of a natural taste reward (**Fig. 4**). Specifically, we expressed the blue-light-gated  
352 cation channel channelrhodopsin-2-XXL as the optogenetic effector (*Chr2-XXL*; Dawydow et al., 2014)  
353 in a single dopaminergic neuron per brain hemisphere, called PPL1- $\gamma$ 1pedc (alternative nomenclatures:  
354 PPL1-01 and MB-MP1), as covered by the Split-GAL4 driver strain *MB320C* (Aso et al., 2014). This  
355 neuron, when optogenetically activated, carries an internal punishment signal sufficient to establish  
356 an aversive associative memory when paired with an odor (Aso and Rubin, 2016; Hige et al., 2015;

357 König et al., 2018) (**Fig. 4A, left-most box plot**). Upon feeding 3IY for 48 hours before training, memory  
358 scores were decreased, an effect that was restored by L-DOPA feeding (**Fig. 4A and S5A**). The effect of  
359 3IY in reducing memory scores increased with increasing 3IY concentrations (**Fig. 4B and S5B**). 3IY  
360 feeding left innate odor preference to either odor unaffected (**Fig. 4C-D**) and feeding L-DOPA alone did  
361 not increase memory scores (**Fig. 4E and S5C**). Thus, feeding 3IY specifically impaired associative  
362 learning in adult flies, but kept their task-relevant behavioral capacities intact.

363

## 364 **Discussion**

365 The present study demonstrates that both in larval and adult *D. melanogaster*, and in two very  
366 different kinds of task, feeding 3IY can specifically impair associative learning while innate behavior  
367 remains intact. In either case, the observed memory impairment was rescued by feeding L-DOPA,  
368 suggesting that the 3IY-impairment was indeed caused by an inhibition of the tyrosine hydroxylase  
369 enzyme that catalyzes the synthesis of L-DOPA. These results confirm previous studies that had used  
370 genetic tools to demonstrate the critical role of dopamine for associative learning in *D. melanogaster*  
371 (Himmelreich et al., 2017; Kim et al., 2007; Riemensperger et al., 2011; Rohwedder et al., 2016; Selcho  
372 et al., 2009).

373 This study provides an approach to manipulating the dopaminergic system of *D. melanogaster*  
374 independently of genetic tools. It is easy to apply, quick, and comparably cheap. It does not require  
375 generating new fly strains, but can be easily combined with the use of already available genetic tools  
376 that would manipulate the dopaminergic system in other ways, or that target different types of  
377 processes (**Fig. 4**). Also, the effects of the drugs can be titrated relatively conveniently by adjusting the  
378 concentration and the duration of feeding. This makes it possible to find a trade-off between  
379 maximizing the intended effect on learning and memory and minimizing developmental side effects.  
380 Furthermore, drugs such as 3IY, with comparable effects in different organisms, allow for elegant  
381 translational research across different species. Finally, it may actually be an advantage that systemic  
382 pharmacological approaches affect the target process in the complete organism at once. For example,  
383 using the genetic driver strain TH-Gal4, which was widely believed to cover all dopaminergic neurons,  
384 Schwaerzel et al. (2003) suggested that dopaminergic neurons were responsible only for punishment,  
385 but not reward signaling (see also Schroll et al., 2006, regarding larvae). This needed to be reconsidered  
386 when it turned out that the driver strain in question missed a crucial cluster of dopaminergic neurons  
387 that do indeed signal reward (Burke et al., 2012; Liu et al., 2012; larvae: Rohwedder et al., 2016). A  
388 systemic pharmacological approach could have made this discovery possible many years earlier.

389 Taken together, the pharmacological approach introduced here adds to the toolbox for  
390 *Drosophila* neuroscience and will hopefully help us to understand the functions of the dopaminergic  
391 system and the brain in general – in *D. melanogaster* and other animals.

392

393

394 **Acknowledgements**

395 Discussions with B. Gerber and P. Stevenson, as well as technical assistance by A. Ciuraszkiewicz-  
396 Wojciech, B. Kracht, T. Niewalda and M. Thane, are gratefully acknowledged. We thank R.D.V. Glasgow  
397 (Zaragoza, Spain) for language editing.

398

399 **Competing interests**

400 The authors declare no competing interests.

401

402 **Author contributions**

403 CK, JT, MS, AW, NT and NM conceived and planned the study; CK, JT, AW, NT, NM and FA performed  
404 the experiments; JT, CK and MS analyzed the data; MS, JT, CK and AW wrote the manuscript with input  
405 of all authors.

406

407 **Funding**

408 This study received institutional support from the Otto von Guericke Universität Magdeburg (OVGU),  
409 the Wissenschaftsgemeinschaft Gottfried Wilhelm Leibniz (WGL), the Leibniz Institute for  
410 Neurobiology (LIN), as well as grant support from the Deutsche Forschungsgemeinschaft (DFG) (GE  
411 1091/4-1, and FOR 2705 Mushroom body), the German-Israeli Foundation for Science (GIF) (G-2502-  
412 418.13/2018, to MS), and the Japan Society for the Promotion of Science (Overseas Research  
413 Fellowship, to NT).

414

415 **References**

416 Andretic, R., Van Swinderen, B., and Greenspan, R.J. (2005). Dopaminergic modulation of arousal in  
417 *Drosophila*. *Curr. Biol.* *15*, 1165–1175.

418 Aso, Y., and Rubin, G.M. (2016). Dopaminergic neurons write and update memories with cell-type-  
419 specific rules. *Elife* *5*, e16135.

420 Aso, Y., Hattori, D., Yu, Y., Johnston, R.M., Iyer, N.A., Ngo, T.T.B., Dionne, H., Abbott, L.F., Axel, R.,  
421 Tanimoto, H., et al. (2014). The neuronal architecture of the mushroom body provides a logic for  
422 associative learning. *Elife* *3*, e04577.

423 Bainton, R.J., Tsai, L.T.Y., Singh, C.M., Moore, M.S., Neckameyer, W.S., and Heberlein, U. (2000).  
424 Dopamine modulates acute responses to cocaine, nicotine and ethanol in *Drosophila*. *Curr. Biol.* *10*,  
425 187–194.

426 Berke, J.D. (2018). What does dopamine mean? *Nat. Neurosci.* *21*, 787–793.

427 Burke, C.J., Huetteroth, W., Oswald, D., Perisse, E., Krashes, M.J., Das, G., Gohl, D., Silies, M., Certel, S.,  
428 and Waddell, S. (2012). Layered reward signalling through octopamine and dopamine in *Drosophila*.  
429 *Nature* *492*, 433–437.

- 430 Busto, G.U., Cervantes-Sandoval, I., and Davis, R.L. (2010). Olfactory learning in *Drosophila*.  
431 *Physiology* 25, 338–346.
- 432 Chang, H.Y., Grygoruk, A., Brooks, E.S., Ackerson, L.C., Maidment, N.T., Bainton, R.J., and Krantz, D.E.  
433 (2006). Overexpression of the *Drosophila* vesicular monoamine transporter increases motor activity  
434 and courtship but decreases the behavioral response to cocaine. *Mol. Psychiatry* 11, 99–113.
- 435 Cichewicz, K., Garren, E.J., Adiele, C., Aso, Y., Wang, Z., Wu, M., Birman, S., Rubin, G.M., and Hirsh, J.  
436 (2017). A new brain dopamine-deficient *Drosophila* and its pharmacological and genetic rescue.  
437 *Genes, Brain Behav.* 16, 394–403.
- 438 Clark, W.C., Pass, P.S., Venkataraman, B., and Hodgetts, R.B. (1978). Dopa decarboxylase from  
439 *Drosophila melanogaster* - Purification, characterization and an analysis of mutants. *MGG Mol. Gen.*  
440 *Genet.* 162, 287–297.
- 441 Dawydow, A., Gueta, R., Ljaschenko, D., Ullrich, S., Hermann, M., Ehmann, N., Gao, S., Fiala, A.,  
442 Langenhan, T., Nagel, G., et al. (2014). Channelrhodopsin-2-XXL, a powerful optogenetic tool for low-  
443 light applications. *Proc. Natl. Acad. Sci.* 111, 13972–13977.
- 444 Diegelmann, S., Klagges, B., Michels, B., Schleyer, M., and Gerber, B. (2013). Maggot learning and  
445 synapsin function. *J. Exp. Biol.* 216, 939–951.
- 446 Fernandez, R.W., Akinleye, A.A., Nurilov, M., Feliciano, O., Lollar, M., Aijuri, R.R., O'Donnell, J.M., and  
447 Simon, A.F. (2017). Modulation of social space by dopamine in *Drosophila melanogaster*, but no  
448 effect on the avoidance of the *Drosophila* stress odorant. *Biol. Lett.* 13, 20170369.
- 449 Friggi-Grelin, F., Coulom, H., Meller, M., Gomez, D., Hirsh, J., and Birman, S. (2003). Targeted gene  
450 expression in *Drosophila* dopaminergic cells using regulatory sequences from Tyrosine Hydroxylase.  
451 *J. Neurobiol.* 54, 618–627.
- 452 Gerber, B., and Stocker, R.F. (2007). The *Drosophila* larva as a model for studying chemosensation  
453 and chemosensory learning: A review. *Chem. Senses* 32, 65–89.
- 454 Gershow, M., Berck, M., Mathew, D., Luo, L., Kane, E.A., Carlson, J.R., and Samuel, A.D.T. (2012).  
455 Controlling airborne cues to study small animal navigation. *Nat. Methods* 9, 290–296.
- 456 Gomez-Marin, A., and Louis, M. (2014). Multilevel control of run orientation in *Drosophila* larval  
457 chemotaxis. *Front. Behav. Neurosci.* 8, 38.
- 458 Gomez-Marin, A., Stephens, G.J., and Louis, M. (2011). Active sampling and decision making in  
459 *Drosophila* chemotaxis. *Nat. Commun.* 2, 1–10.
- 460 Guven-Ozkan, T., and Davis, R.L. (2014). Functional neuroanatomy of *Drosophila* olfactory memory  
461 formation. *Learn. Mem.* 21, 519–526.
- 462 Heisenberg, M. (2003). Mushroom body memoir: From maps to models. *Nat. Rev. Neurosci.* 4, 266–  
463 275.
- 464 Hige, T., Aso, Y., Modi, M.N., Rubin, G.M., and Turner, G.C. (2015). Heterosynaptic plasticity underlies  
465 aversive olfactory learning in *Drosophila*. *Neuron* 88, 985–998.
- 466 Himmelreich, S., Masuho, I., Berry, J.A., MacMullen, C., Skamangas, N.K., Martemyanov, K.A., and  
467 Davis, R.L. (2017). Dopamine Receptor DAMB Signals via Gq to Mediate Forgetting in *Drosophila*. *Cell*  
468 *Rep.* 21, 2074–2081.

- 469 Holm, S. (1979). A simple sequentially rejective multiple test procedure. *Scand. J. Stat.* *6*,  
470 65–70.
- 471 Hsouna, A., Lawal, H.O., Izevbaye, I., Hsu, T., and O'Donnell, J.M. (2007). *Drosophila* dopamine  
472 synthesis pathway genes regulate tracheal morphogenesis. *Dev. Biol.* *308*, 30–43.
- 473 Karam, C.S., Jones, S.K., and Javitch, J.A. (2019). Come Fly with Me: An overview of dopamine  
474 receptors in *Drosophila melanogaster*. *Basic Clin. Pharmacol. Toxicol.* *1*, 1–10.
- 475 Kaun, K.R., Azanchi, R., Maung, Z., Hirsh, J., and Heberlein, U. (2011). A *Drosophila* model for alcohol  
476 reward. *Nat Neurosci* *14*, 612–619.
- 477 Kim, Y.C., Lee, H.G., and Han, K.A. (2007). D1 dopamine receptor dDA1 is required in the mushroom  
478 body neurons for aversive and appetitive learning in *Drosophila*. *J. Neurosci.* *27*, 7640–7647.
- 479 König, C., Schleyer, M., Leibiger, J., El-Keredy, A., and Gerber, B. (2014). Bitter-sweet processing in  
480 larval *Drosophila*. *Chem. Senses* *39*, 489–505.
- 481 König, C., Khalili, A., Ganesan, M., Nishu, A.P., Garza, A.P., Niewalda, T., Gerber, B., Aso, Y., and Yarali,  
482 A. (2018). Reinforcement signaling of punishment versus relief in fruit flies. *Learn. Mem.* *25*, 247–  
483 257.
- 484 König, C., Khalili, A., Niewalda, T., Gao, S., and Gerber, B. (2019). An optogenetic analogue of second-  
485 order reinforcement in *Drosophila*. *Biol. Lett.* *15*, 9–13.
- 486 Liu, C., Plaçais, P.Y., Yamagata, N., Pfeiffer, B.D., Aso, Y., Friedrich, A.B., Siwanowicz, I., Rubin, G.M.,  
487 Preat, T., and Tanimoto, H. (2012). A subset of dopamine neurons signals reward for odour memory  
488 in *Drosophila*. *Nature* *488*, 512–516.
- 489 McGuire, S.E., Deshazer, M., and Davis, R.L. (2005). Thirty years of olfactory learning and memory  
490 research in *Drosophila melanogaster*. *Prog. Neurobiol.* *76*, 328–347.
- 491 Meder, D., Herz, D.M., Rowe, J.B., Lehéricy, S., and Siebner, H.R. (2019). The role of dopamine in the  
492 brain - lessons learned from Parkinson's disease. *Neuroimage* *190*, 79–93.
- 493 Michels, B., Saumweber, T., Biernacki, R., Thum, J., Glasgow, R.D.V., Schleyer, M., Chen, Y.C.,  
494 Eschbach, C., Stocker, R.F., Toshima, N., et al. (2017). Pavlovian conditioning of larval *Drosophila*: An  
495 illustrated, multilingual, hands-on manual for odor-taste associative learning in maggots. *Front.*  
496 *Behav. Neurosci.* *11*, 1–6.
- 497 Monier, M., Nöbel, S., Danchin, E., and Isabel, G. (2019). Dopamine and serotonin are both required  
498 for mate-copying in *Drosophila melanogaster*. *Front. Behav. Neurosci.* *12*, 1–5.
- 499 Neckameyer, W.S. (1996). Multiple roles for Dopamine in *Drosophila* development. *Dev. Biol.* *176*,  
500 209–219.
- 501 Neckameyer, W.S. (1998). Dopamine and mushroom bodies in *Drosophila*: Experience-dependent  
502 and - independent aspects of sexual behavior. *Learn. Mem.* *5*, 157–165.
- 503 Neckameyer, W.S., and White, K. (1993). *Drosophila* Tyrosine Hydroxylase Is Encoded By the Pale  
504 Locus. *J. Neurogenet.* *8*, 189–199.
- 505 Nichols, C.D. (2006). *Drosophila melanogaster* neurobiology, neuropharmacology, and how the fly  
506 can inform central nervous system drug discovery. *Pharmacol. Ther.* *112*, 677–700.



- 507 Oishi, Y., and Lazarus, M. (2017). The control of sleep and wakefulness by mesolimbic dopamine  
508 systems. *Neurosci. Res.* *118*, 66–73.
- 509 Oswald, D., and Waddell, S. (2015). Olfactory learning skews mushroom body output pathways to  
510 steer behavioral choice in *Drosophila*. *Curr. Opin. Neurobiol.* *35*, 178–184.
- 511 Paisios, E., Rjosk, A., Pamir, E., and Schleyer, M. (2017). Common microbehavioral “footprint” of two  
512 distinct classes of conditioned aversion. *Learn. Mem.* *24*, 191–198.
- 513 Pandey, U.B., and Nichols, C.D. (2011). Human disease models in *Drosophila melanogaster* and the  
514 role of the fly in therapeutic drug discovery. *Pharmacol. Rev.* *63*, 411–436.
- 515 Perisse, E., Yin, Y., Lin, A.C., Lin, S., Huetteroth, W., and Waddell, S. (2013). Different Kenyon Cell  
516 Populations Drive Learned Approach and Avoidance in *Drosophila*. *Neuron* *79*, 945–956.
- 517 Pyakurel, P., Shin, M., and Venton, B.J. (2018). Nicotinic acetylcholine receptor (nAChR) mediated  
518 dopamine release in larval *Drosophila melanogaster*. *Neurochem. Int.* *114*, 33–41.
- 519 Quinn, W.G., Harris, W.A., and Benzer, S. (1974). Conditioned behavior in *Drosophila melanogaster*.  
520 *Proc. Natl. Acad. Sci. U. S. A.* *71*, 708–712.
- 521 Riemensperger, T., Isabel, G., Coulom, H., Neuser, K., Seugnet, L., Kume, K., Iché-Torres, M., Cassar,  
522 M., Strauss, R., Preat, T., et al. (2011). Behavioral consequences of dopamine deficiency in the  
523 *Drosophila* central nervous system. *Proc. Natl. Acad. Sci. U. S. A.* *108*, 834–839.
- 524 Rohwedder, A., Wenz, N.L., Stehle, B., Huser, A., Yamagata, N., Zlatic, M., Truman, J.W., Tanimoto, H.,  
525 Saumweber, T., Gerber, B., et al. (2016). Four Individually Identified Paired Dopamine Neurons Signal  
526 Reward in Larval *Drosophila*. *Curr. Biol.* *26*, 661–669.
- 527 Ryvkin, J., Bentzur, A., Zer-Krispil, S., and Shohat-Ophir, G. (2018). Mechanisms underlying the risk to  
528 develop drug addiction, insights from studies in *Drosophila melanogaster*. *Front. Physiol.* *9*, 327.
- 529 Saumweber, T., Husse, J., and Gerber, B. (2011). Innate attractiveness and associative learnability of  
530 odors can be dissociated in larval *Drosophila*. *Chem. Senses* *36*, 223–235.
- 531 Scaplen, K.M., and Kaun, K.R. (2016). Reward from bugs to bipeds: a comparative approach to  
532 understanding how reward circuits function. *J. Neurogenet.* *30*, 133–148.
- 533 Scherer, S., Stocker, R.F., and Gerber, B. (2003). Olfactory learning in individually assayed *Drosophila*  
534 larvae. *Learn. Mem.* *10*, 217–225.
- 535 Schleyer, M., Reid, S.F., Pamir, E., Saumweber, T., Paisios, E., Davies, A., Gerber, B., and Louis, M.  
536 (2015). The impact of odor-reward memory on chemotaxis in larval *Drosophila*. *Learn. Mem.* *22*,  
537 267–277.
- 538 Schroll, C., Riemensperger, T., Bucher, D., Ehmer, J., Völler, T., Erbguth, K., Gerber, B., Hendel, T.,  
539 Nagel, G., Buchner, E., et al. (2006). Light-induced activation of distinct modulatory neurons triggers  
540 appetitive or aversive learning in *Drosophila* larvae. *Curr. Biol.* *16*, 1741–1747.
- 541 Schultz, W. (2007). Multiple dopamine functions at different time courses. *Annu. Rev. Neurosci.* *30*,  
542 259–288.
- 543 Schultz, W. (2015). Neuronal reward and decision signals: From theories to data. *Physiol. Rev.* *95*,  
544 853–951.

- 545 Schwaerzel, M., Monastirioti, M., Scholz, H., Friggi-Grelin, F., Birman, S., and Heisenberg, M. (2003).  
546 Dopamine and Octopamine differentiate between aversive and appetitive olfactory memories in  
547 *Drosophila*. *J. Neurosci.* *23*, 10495–10502.
- 548 Selcho, M., Pauls, D., Han, K.A., Stocker, R.F., and Thum, A.S. (2009). The role of dopamine in  
549 *Drosophila* larval classical olfactory conditioning. *PLoS One* *4*, e5897.
- 550 Seugnet, L., Suzuki, Y., Vine, L., Gottschalk, L., and Shaw, P.J. (2008). D1 Receptor Activation in the  
551 Mushroom Bodies Rescues Sleep-Loss-Induced Learning Impairments in *Drosophila*. *Curr. Biol.* *18*,  
552 1110–1117.
- 553 Srivastava, D.P., Yu, E.J., Kennedy, K., Chatwin, H., Reale, V., Hamon, M., Smith, T., and Evans, P.D.  
554 (2005). Rapid, nongenomic responses to ecdysteroids and catecholamines mediated by a novel  
555 *Drosophila* G-protein-coupled receptor. *J. Neurosci.* *25*, 6145–6155.
- 556 Thane, M., Viswanathan, V., Meyer, T.C., Paisios, E., and Schleyer, M. (2019). Modulations of  
557 microbehaviour by associative memory strength in *Drosophila* larvae. *PLoS One* *14*, e0224154.
- 558 Thum, A.S., and Gerber, B. (2019). Connectomics and function of a memory network: the mushroom  
559 body of larval *Drosophila*. *Curr. Opin. Neurobiol.* *54*, 146–154.
- 560 Tomita, J., Ueno, T., Mitsuyoshi, M., Kume, S., and Kume, K. (2015). The NMDA receptor promotes  
561 sleep in the fruit fly, *Drosophila melanogaster*. *PLoS One* *10*, 1–15.
- 562 Ueno, T., and Kume, K. (2014). Functional characterization of dopamine transporter in vivo using  
563 *Drosophila melanogaster* behavioral assays. *Front. Behav. Neurosci.* *8*, 1–11.
- 564 Verlinden, H. (2018). Dopamine signalling in locusts and other insects. *Insect Biochem. Mol. Biol.* *97*,  
565 40–52.
- 566 Waddell, S. (2013). Reinforcement signalling in *Drosophila*; dopamine does it all after all. *Curr. Opin.*  
567 *Neurobiol.* *23*, 324–329.
- 568 Wang, Y., Pu, Y., and Shen, P. (2013). Neuropeptide-gated perception of appetitive olfactory inputs in  
569 *drosophila* larvae. *Cell Rep.* *3*, 820–830.
- 570 Weiglein, A., Gerstner, F., Mancini, N., Schleyer, M., and Gerber, B. (2019). One-trial learning in larval  
571 *Drosophila*. *Learn. Mem.* *26*, 109–120.
- 572 Wicker-Thomas, C., and Hamann, M. (2008). Interaction of dopamine, female pheromones,  
573 locomotion and sex behavior in *Drosophila melanogaster*. *J. Insect Physiol.* *54*, 1423–1431.
- 574 Widmann, A., Eichler, K., Selcho, M., Thum, A.S., and Pauls, D. (2018). Odor-taste learning in  
575 *Drosophila* larvae. *J. Insect Physiol.* *106*, 47–54.
- 576 Xiao, N., and Venton, B.J. (2015). Characterization of dopamine releasable and reserve pools in  
577 *Drosophila* larvae using ATP/P2X<sub>2</sub>-mediated stimulation. *J. Neurochem.* *134*, 445–454.
- 578 Yamamoto, K., and Vernier, P. (2011). The evolution of dopamine systems in chordates. *Front.*  
579 *Neuroanat.* *5*.
- 580 Yamamoto, S., and Seto, E.S. (2014). Dopamine dynamics and signaling in *Drosophila*: An overview of  
581 genes, drugs and behavioral paradigms. *Exp. Anim.* *63*, 107–119.
- 582 Yellman, C., Tao, H., He, B., and Hirsh, J. (1997). Conserved and sexually dimorphic behavioral

- 583 responses to biogenic amines in decapitated *Drosophila*. *Proc. Natl. Acad. Sci. U. S. A.* *94*, 4131–4136.
- 584 Zhang, S., Yin, Y., Lu, H., and Guo, A. (2008). Increased dopaminergic signaling impairs aversive  
585 olfactory memory retention in *Drosophila*. *Biochem. Biophys. Res. Commun.* *370*, 82–86.

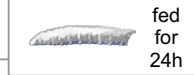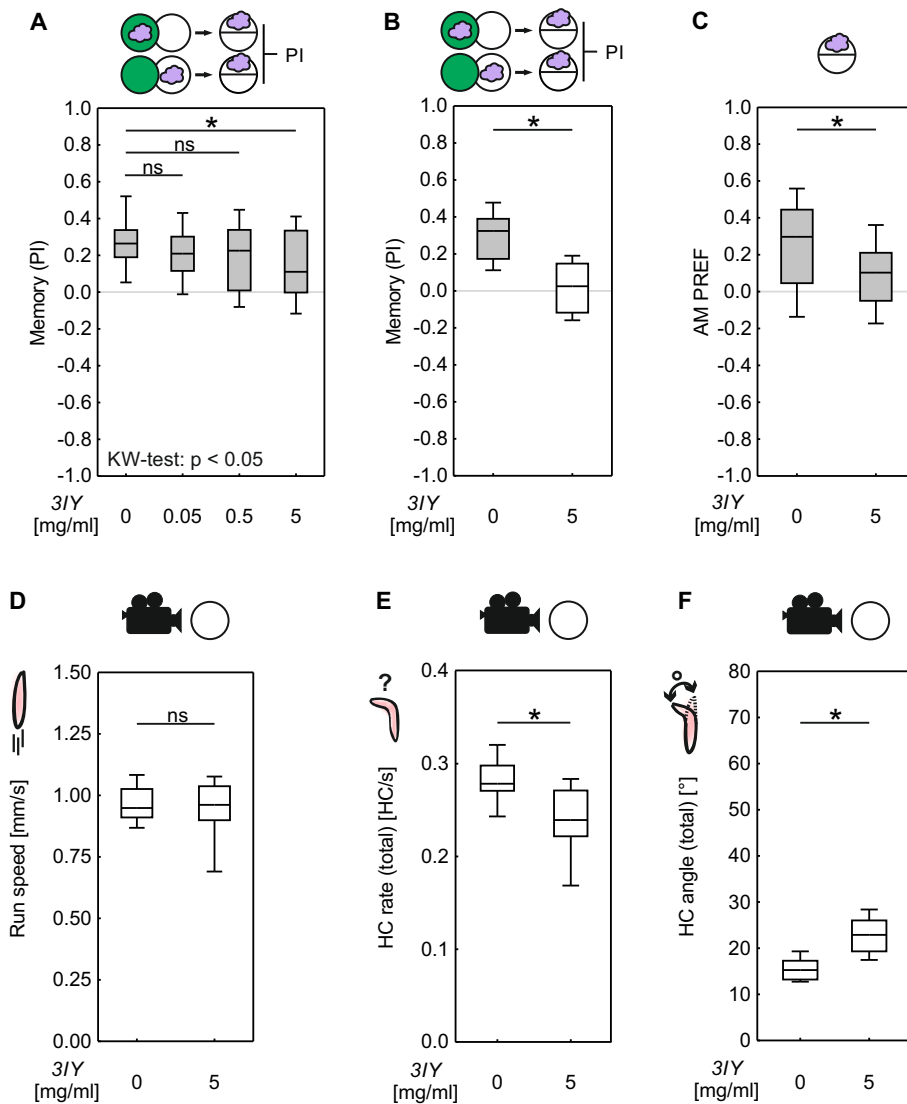

**Figure 1:** Feeding 3IY to *D. melanogaster* larvae for 24h broadly impairs behavior.

**(A)** Cohorts of larvae were trained by either paired or unpaired presentations of an odor (purple cloud) and sugar (green circle), and subsequently tested for odor preference. Feeding different concentrations of 3IY for 24h led to memory impairment (KW:  $H = 8.44$ , d.f. = 3,  $P = 0.378$ ; OSS from left to right:  $P < 0.0001$ ;  $P < 0.0001$ ;  $P = 0.0019$ ;  $P = 0.0039$ ;  $N = 36$  each), with a significant reduction compared to the control only in the group with the highest tested concentration of 5mg/ml 3IY (MWU:  $U = 405.00$ ,  $P = 0.0063$ ). All other tested concentrations did not affect memory scores compared to the control group (MWU: 0 vs. 0.05 mg/ml 3IY:  $U = 533.50$ ,  $P = 0.1992$ ; 0 vs. 0.5 mg/ml 3IY:  $U = 518.00$ ,  $P = 0.1447$ ). **(B)** As seen in (A), larvae fed with 5mg/ml 3IY showed impaired memory (MWU:  $U = 19.00$ ,  $P = 0.0024$ ; OSSs from left to right:  $P = 0.0005$ ;  $P = 0.7744$ ;  $N = 12$  each) in an independent repetition. **(C)** An innate preference test revealed lower preference for the tested odor in the group fed with 5 mg/ml 3IY compared to the control group (MWU:  $U = 852.00$ ,  $P = 0.0061$ ; OSSs from left to right:  $P < 0.0001$ ;  $P = 0.0066$ ;  $N = 50$  each). **(D)** Offline analysis of larval behavior revealed no difference in run speed between control larvae and larvae fed with 5 mg/ml 3IY (MWU:  $U = 192.00$ ,  $P = 0.8392$ ,  $N = 20$  each). Regarding head casts, larvae fed with 5 mg/ml 3IY compared to control larvae showed **(E)** fewer head casts (MWU:  $U = 76.00$ ,  $P = 0.0008$ ,  $N = 20$  each) but **(F)** made larger head casts (MWU:  $U = 28.00$ ,  $P < 0.0001$ ,  $N = 20$  each). Grey boxes reflect memories relative to chance levels (PI = 0) significant at  $P < 0.05$  in OSS-tests with Bonferroni-Holm correction. KW-tests are indicated within the figure. Asterisks and ns above horizontal lines reflect significance or lack thereof in MWU-tests. Box plots represent the median as the midline, 25 and 75% as the box boundaries, and 10 and 90% as the whiskers. See Figure S2 for preference scores underlying the PIs and detailed head cast analysis.

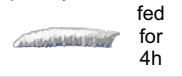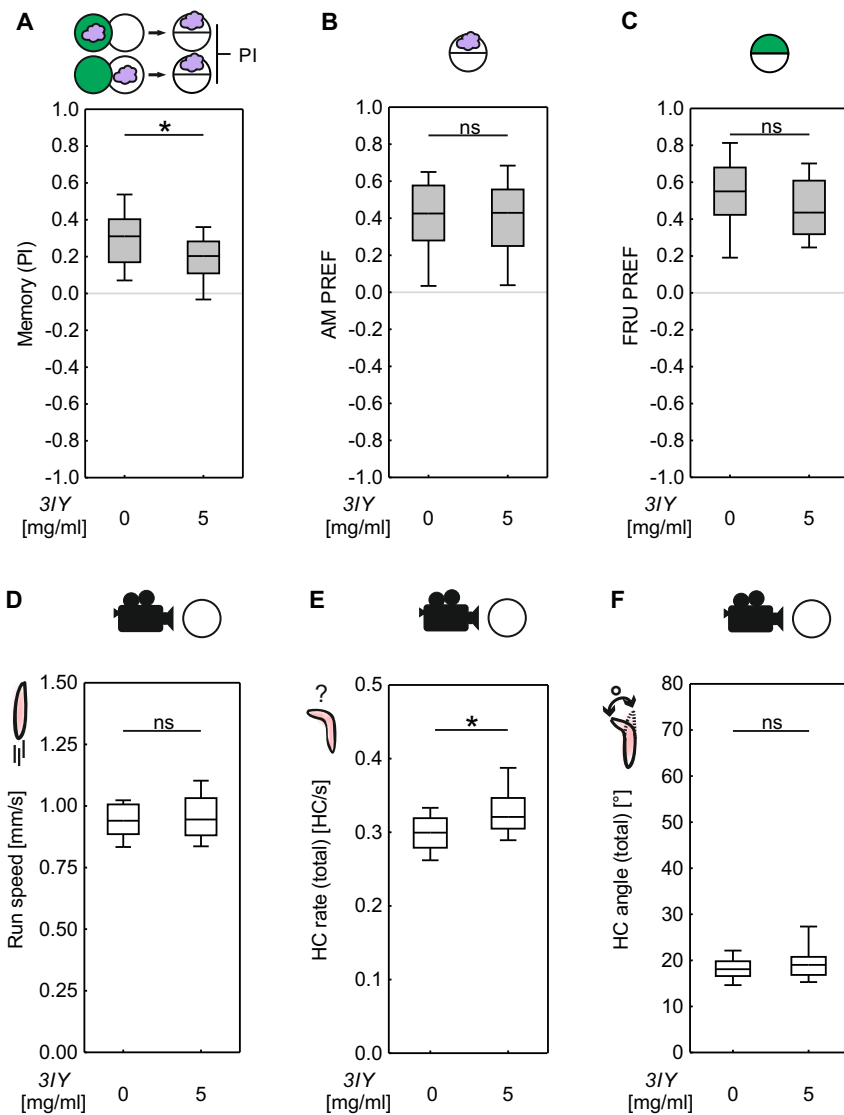

**Figure 2:** Feeding 3IY to *D. melanogaster* larvae for 4h impairs memory but leaves innate behavior intact.

**(A)** Larvae fed with 5 mg/ml 3IY for 4h showed impaired memory compared to the control group (MWU:  $U = 125.00$ ,  $P = 0.0439$ ; OSS from left to right:  $P < 0.0001$ ;  $P = 0.0004$ ;  $N = 20$  each). Innate preference for the **(B)** odor (MWU:  $U = 230.50$ ,  $P = 0.7963$ ; OSS:  $P < 0.0001$  each;  $N = 22$  each) or **(C)** FRU (MWU:  $U = 344.00$ ,  $P = 0.1188$ ; OSS:  $P < 0.000$  each;  $N = 30$  each) was not affected. Video-tracking of the larvae revealed **(D)** no difference in run speed (MWU:  $U = 254.00$ ,  $P = 0.4897$ ,  $N = 24$  each), **(E)** a slight increase in HC rate for larvae fed with 5mg/ml 3IY (MWU:  $U = 174.00$ ,  $P = 0.0193$ ,  $N = 24$  each), and **(F)** no difference in HC angles (MWU:  $U = 247.00$ ,  $P = 0.4037$ ;  $N = 24$  each). See Figure S3 for preference scores underlying the PIs and detailed analysis of head casts. For further details, see Figure 1.

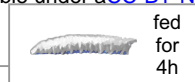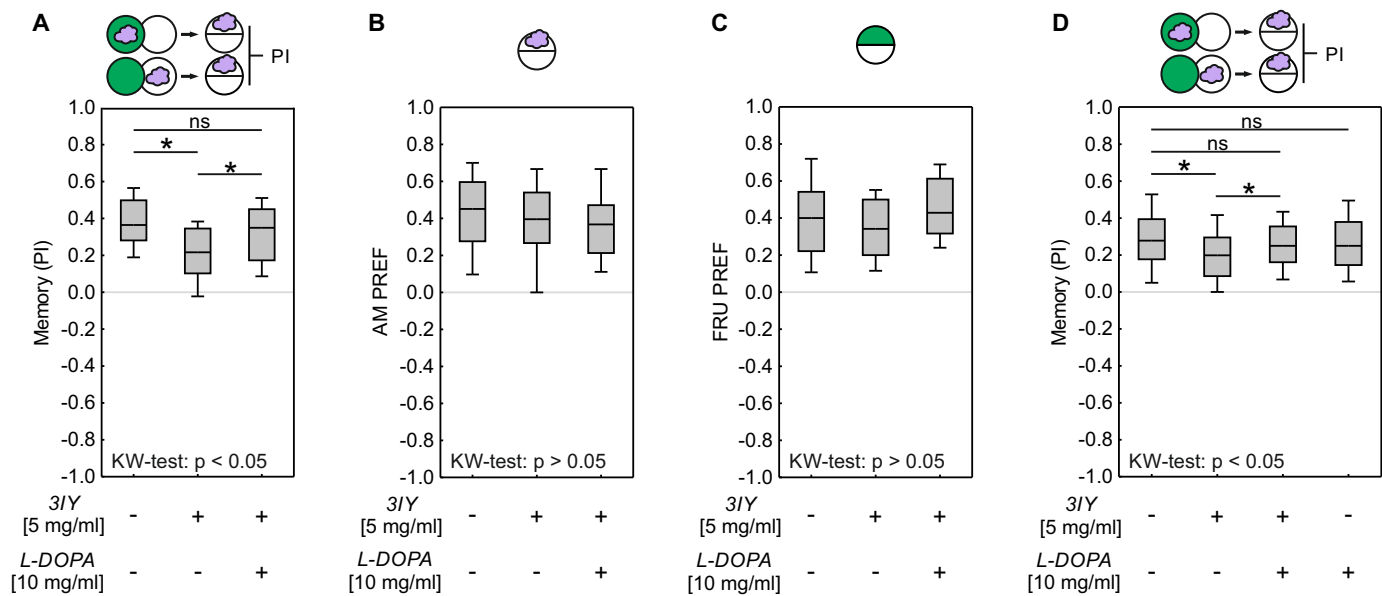

**Figure 3:** Memory impairment in *Drosophila* larvae due to 3IY can be rescued by additionally feeding L-DOPA.

**(A)** Feeding L-DOPA in addition to 3IY rescued the memory impairment (KW:  $H = 10.69$ , d.f. = 2,  $P = 0.0048$ ; OSS from left to right:  $P < 0.0001$ ;  $P = 0.0005$ ;  $P < 0.0001$ ;  $N = 26$  each). Feeding 5 mg/ml 3IY alone for 4h impaired memory (MWU:  $U = 165.50$ ,  $P = 0.0016$ ) whereas additionally feeding 10 mg/ml L-DOPA rescued memory impairment (MWU:  $U = 215.00$ ,  $P = 0.0250$ ) and led to memory scores comparable to the control group (MWU:  $U = 286.00$ ,  $P = 0.3459$ ). Feeding either drug did not affect innate approach to **(B)** odor (KW:  $H = 2.02$ , d.f. = 2,  $P = 0.3650$ ; OSS from left to right:  $P < 0.0001$ ;  $P < 0.0001$ ;  $P < 0.0001$ ;  $N = 28$  each) or **(C)** FRU (KW:  $H = 2.42$ , d.f. = 2,  $P = 0.2977$ ; OSSs from left to right:  $P < 0.0001$ ;  $P < 0.0001$ ;  $P < 0.0001$ ; 24 each). **(D)** As shown in (A), feeding 3IY impaired memory scores and this impairment was rescued by additional L-DOPA feeding (KW:  $H = 14.06$ , d.f. = 3,  $P = 0.0028$ ; OSS:  $P < 0.0001$  each;  $N = 96$  each; MWU: no drug vs. 3IY alone:  $U = 3262.50$ ,  $P = 0.0005$ ; no drug vs. 3IY + L-DOPA:  $U = 4084.50$ ,  $P = 0.1743$ ; 3IY alone vs. 3IY + L-DOPA:  $U = 3673.00$ ,  $P = 0.0152$ ). Feeding L-DOPA alone had no effect on memory scores (MWU: no drug vs. L-DOPA alone:  $U = 4246.50$ ,  $P = 0.3484$ ). See Figure S4 for preference scores underlying the PIs. For further details, see Figure 1.

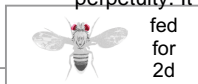

**Figure 4:** Feeding 3IY to adult *D. melanogaster* impairs

optogenetically induced memory but leaves innate behavior intact.

**(A)** Cohorts of flies were trained by pairing one of two odors (yellow / black cloud) with optogenetic activation of PPL1- $\gamma$ 1pedc (blue star), and subsequently tested for their choice between the two odors. 3IY feeding led to an impaired performance index compared to the control group (MWU:  $U = 2.00$ ,  $P = 0.0019$ ). Additional L-DOPA feeding (KW:  $H = 11.89$ , d.f. = 2,  $P = 0.0026$ ; OSS from left to right:  $P = 0.0078$ ;  $P = 0.2891$ ;  $P = 0.0078$ ;  $N = 8$  each) rescued this impairment of memory scores (MWU: 3IY alone vs 3IY+L-DOPA:  $U = 6.00$ ,  $P = 0.0074$ ) to the control level (MWU: no drug vs 3IY+L-DOPA:  $U = 29.00$ ,  $P = 0.7929$ ). **(B)** 3IY concentrations significantly influenced PI values (KW:  $H = 11.08$ , d.f. = 3,  $P = 0.0113$ ; OSS from left to right:  $P = 0.0005$ ;  $P = 0.0018$ ;  $P = 0.2101$ ;  $P = 1.0$ ;  $N = 16, 14, 16, 15$ ). The highest concentration of 5 mg/ml 3IY significantly reduced memory compared to the control group (MWU:  $U = 47.00$ ,  $P = 0.0042$ ). All other tested concentrations of 3IY had no significant effect with the given sample sizes (MWU: 0 vs. 0.05 mg/ml 3IY:  $U = 83.00$ ,  $P = 0.2361$ ; 0 vs. 0.5 mg/ml 3IY:  $U = 72.00$ ,  $P = 0.0365$ ). **(C-D)** Innate odor avoidance of **(C)** OCT and **(D)** BA was not affected by 3IY and / or L-DOPA feeding (KW: OCT:  $H = 4.42$ , d.f. = 2,  $P = 0.1097$ ; OSS from left to right:  $P < 0.0001$ ;  $P < 0.0001$ ;  $P < 0.0001$ ;  $N = 12$  each) (KW: BA:  $H = 2.71$ , d.f. = 2,  $P = 0.2575$ ; OSS from left to right:  $P < 0.0001$ ;  $P < 0.0001$ ;  $N = 12$  each) **(E)** In a repetition of the experiment shown in (A), feeding L-DOPA in addition to 3IY rescued the 3IY-induced memory impairment (KW:  $H = 14.68$ , d.f. = 3,  $P = 0.0021$ ; OSS:  $P < 0.0001$  each;  $N = 13, 12, 11, 12$ ; MWU: no drug vs. 3IY alone:  $U = 29.00$ ,  $P = 0.0083$ ; no drug vs. 3IY + L-DOPA:  $U = 59.00$ ,  $P = 0.4869$ ; 3IY alone vs. 3IY + L-DOPA:  $U = 12.00$ ,  $P = 0.0009$ ). Importantly, L-DOPA alone had no effect on the memory scores (MWU: no drug vs. L-DOPA alone:  $U = 68.00$ ,  $P = 0.6053$ ). See Figure S5 for preference scores underlying the PIs. For further details, see Figure 1.

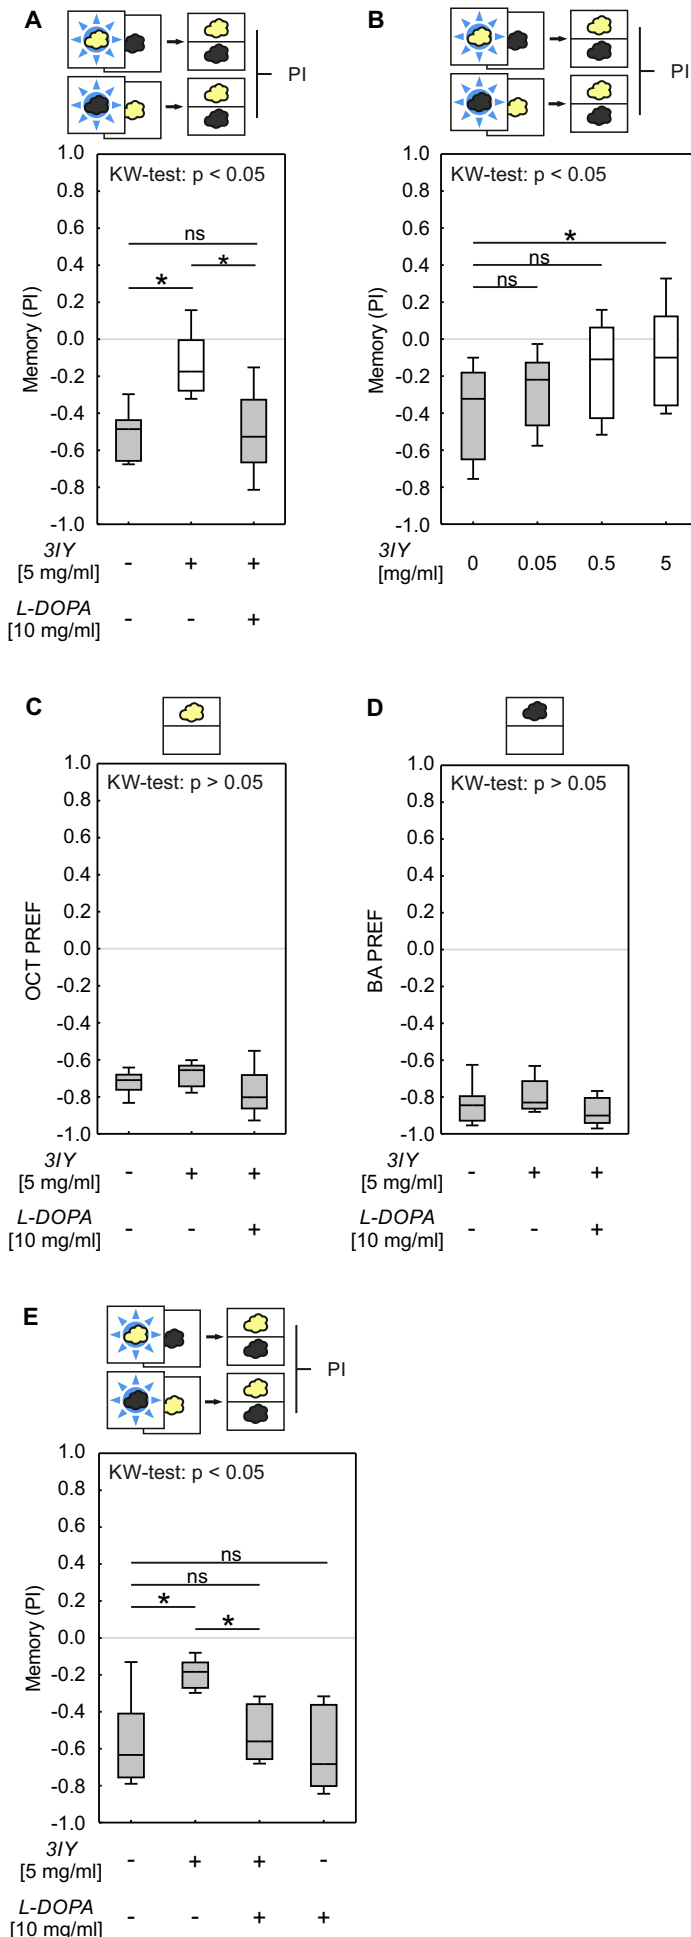

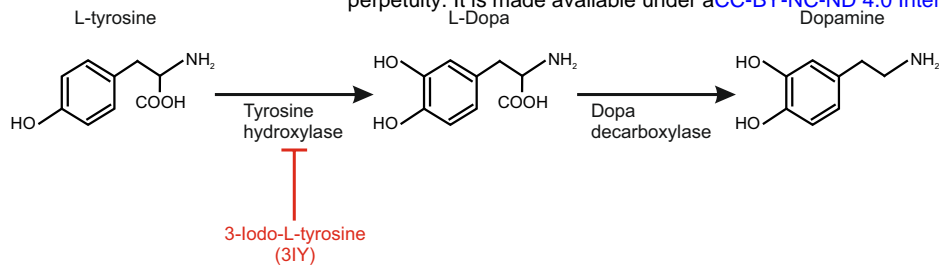

**Figure S1:** Dopamine synthesis.

Dopamine is synthesized via two enzymatic steps. In the first step the amino acid L-tyrosine is converted into L-3,4-dihydroxyphenylalanine (L-DOPA) via tyrosine hydroxylase (TH). In the second step, L-DOPA is converted to dopamine via dopa decarboxylase (DDC). In red, the inhibition of the TH enzyme by 3-Iodo-L-tyrosine (3IY) is shown.



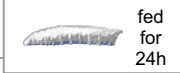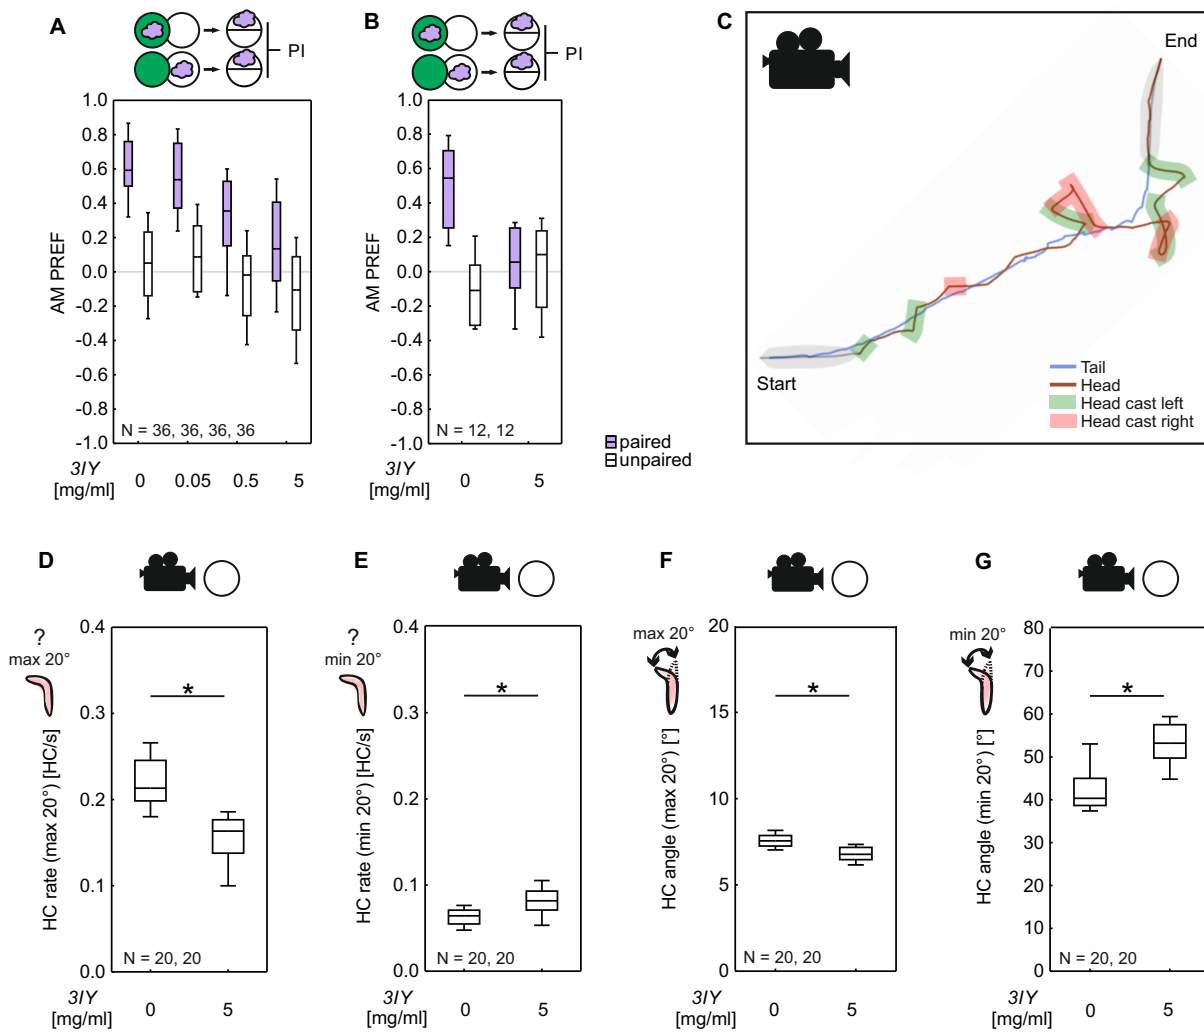

**Figure S2:** Preference and tracking data underlying the results shown in Figure 1.

**(A, B)** Preference data refer to the Performance Indices shown in Figure 1A and B, respectively. Purple boxes represent odor preference after paired training (AM+), white boxes after unpaired training (EM+). **(C)** Example of a track from the video-recording of a single larva showing relatively straight runs interrupted by lateral head movements (head cast, HC). **(D, E)** HC rate for small and large HCs, respectively, classified by a HC angle smaller or greater than 20°. This classification as well as the calculation of the HC angle is based on Paisios et al. (2017). The HC rate was decreased for small HCs **(D)** (MWU:  $U = 29.00$ ,  $P < 0.0001$ ,  $N = 20$  each) and increased for large HCs **(E)** (MWU:  $U = 85.00$ ,  $P = 0.0019$ ,  $N = 20$  each) for larvae fed with 3IY for 24 h. **(F, G)** HC angles classified by small and large HCs. The average HC angle was decreased for small HCs **(F)** (MWU:  $U = 47.00$ ,  $P < 0.0001$ ,  $N = 20$  each) and increased for large HCs **(G)** (MWU:  $U = 46.00$ ,  $P < 0.0001$ ,  $N = 20$  each) for larvae fed with 3IY for 24h. Asterisks above horizontal lines reflect significance in MWU-tests. Box plots represent the median as the midline, 25 and 75% as the box boundaries, and 10 and 90% as the whiskers. Sample sizes are indicated within the figure.

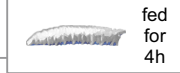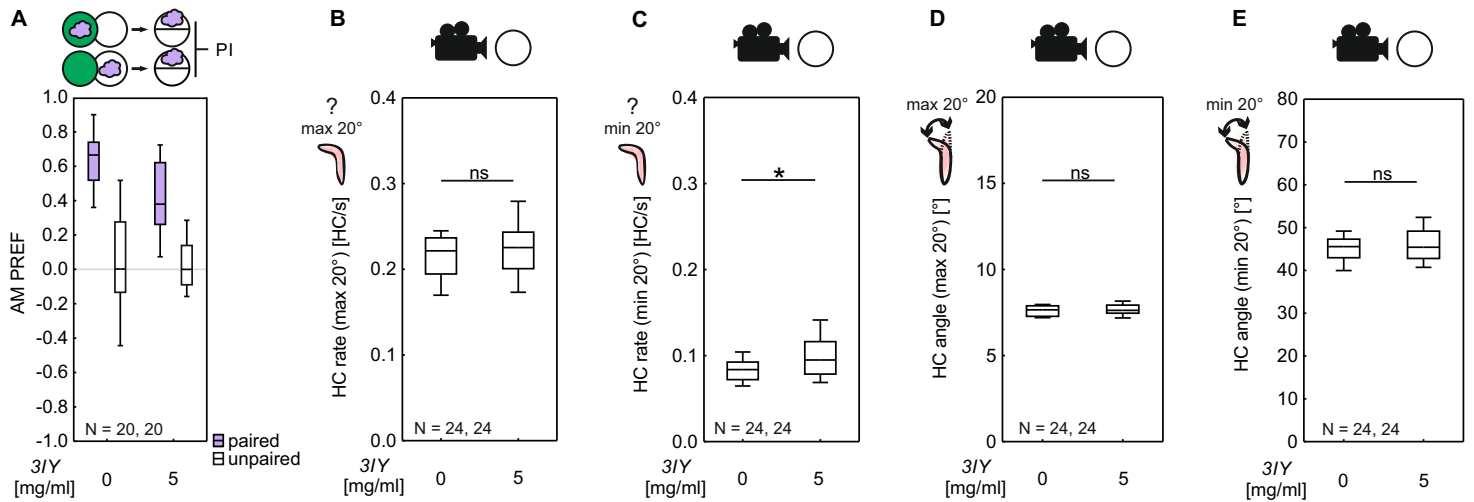

**Figure S3:** Preference and tracking data underlying the results shown in Figure 2.

**(A)** Preference data refer to the Performance Indices shown in Figure 2A. Purple boxes represent odor preference after paired training (AM+), white boxes after unpaired training (EM+). **(B, C)** HC rate classified by small and large HCs. The HC rate for small HCs was unaffected by 3IY feeding **(B)** (MWU:  $U = 231.00$ ,  $P = 0.2440$ ,  $N = 24$  each), but slightly increased for large HCs **(C)** (MWU:  $U = 186.00$ ,  $P = 0.0364$ ,  $N = 24$  each). Comparing these results with those after 24 h feeding (Fig. S2D-E), it seems that both 4 h and 24 h feeding of 3IY slightly increased the rate of large HCs, but only 24 h feeding decreased the rate of small HCs in addition. This resulted in a decrease in total HC rate after 24 h feeding on 3IY as seen in Fig. 1E, and in an increase in total HC rate after 4 h feeding on 3IY as shown in Fig. 2E. **(D, E)** HC angles classified by small and large HCs. No significant effect of 3IY feeding was observed (MWU: HC angle max 20°:  $U = 256.00$ ,  $P = 0.5160$ ,  $N = 24$  each; HC angle min 20°:  $U = 268.00$ ,  $P = 0.6876$ ,  $N = 24$  each). Asterisks and ns above horizontal lines reflect significance or lack thereof in MWU-tests. Box plots represent the median as the midline, 25 and 75% as the box boundaries, and 10 and 90% as the whiskers. Sample sizes are indicated within the figure.

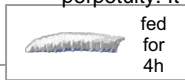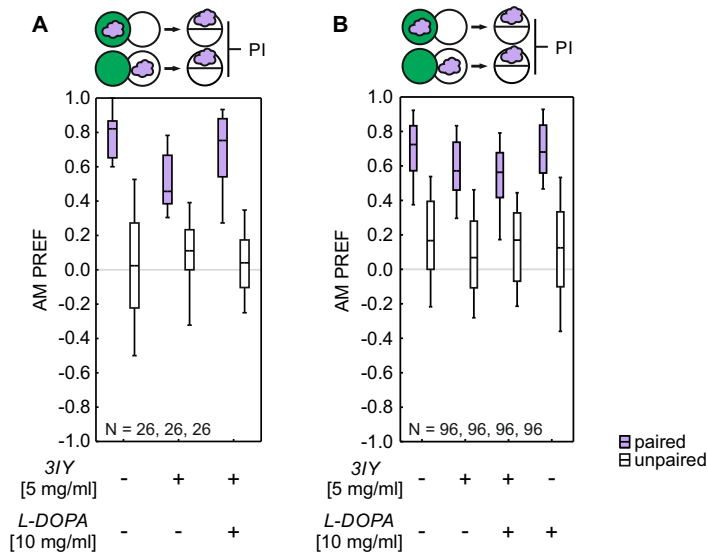

**Figure S4:** Preferences underlying the Performance Indices in Figure 3.

**(A, B)** Preference data refer to the Performance Indices shown in Figure 3A and D, respectively. Purple boxes represent odor preference after paired training (AM+), white boxes after unpaired training (EM+). Box plots represent the median as the midline, 25 and 75% as the box boundaries, and 10 and 90% as the whiskers. Sample sizes are indicated within the figure.

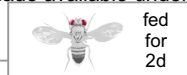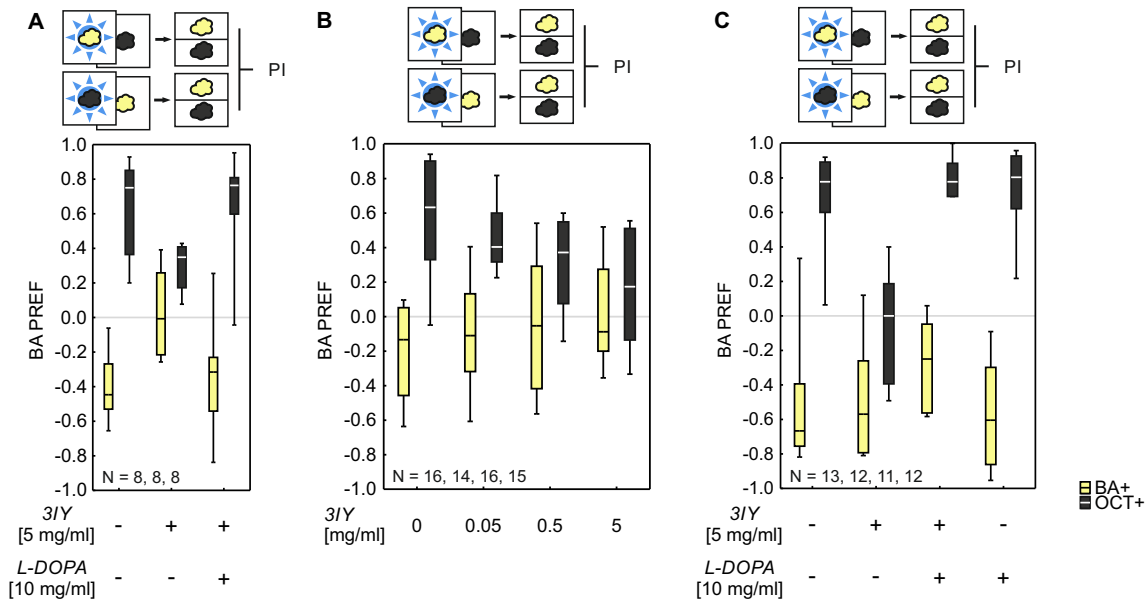

**Figure S5:** Preferences underlying the Performance Indices in Figure 4.

**(A, B, C)** Preference data refer to the Performance Indices shown in Figure 4A, B and E, respectively. Yellow boxes represent BA preference after BA-paired training (BA+), black boxes after OCT-paired training (OCT+). Box plots represent the median as the midline, 25 and 75% as the box boundaries, and 10 and 90% as the whiskers. Sample sizes are indicated within the figure.
